# Supplementary material
Source: PubMed Central journal article supplement (PMC1459221)
Supplement: pbio.0040112.st003.pdf [file pbio.0040112.st003.pdf]

**Table S3.** Significance of the top six variables identified by logistic regression analysis of cytochrome P450 chimeras.

| <b>Variable</b> | <b>p-value<sup>1</sup></b> |
|-----------------|----------------------------|
| 1               | $1 \times 10^{-12}$        |
| 5               | $3 \times 10^{-8}$         |
| 7               | $2 \times 10^{-17}$        |
| 1-7             | $3 \times 10^{-12}$        |
| 1-5             | 0.01                       |
| 5-8             | 0.02                       |

<sup>1</sup>p-values were calculated by removing each variable from the model and applying the likelihood ratio test (see Methods).
